# Supplementary material for: Canagliflozin and Stroke in Type 2 Diabetes Mellitus: Results From the Randomized CANVAS Program Trials
Source: PubMed Central journal article supplement — Stroke. 2018 Dec 28;50(2):396–404. doi: 10.1161/STROKEAHA.118.023009 (PMC6358191; doi:10.1161/strokeaha.118.023009), 2018-12-28
Supplement: str-50-396-s001.pdf [file str-50-396-s001.pdf]

## SUPPLEMENTAL MATERIAL

### Canagliflozin and Stroke in Type 2 Diabetes: Results From the Randomized CANVAS Program Trials

Zien Zhou, MD<sup>1,2</sup>, Richard Lindley, MD<sup>3</sup>, Karin Rådholm, MD, PhD<sup>3,4</sup>, Bronwyn Jenkins, BMed<sup>5</sup>, John Watson, MD, DPhil<sup>6</sup>, Vlado Perkovic, MB, BS, PhD<sup>1,7</sup>, Kenneth W. Mahaffey, MD<sup>8</sup>, Dick de Zeeuw, MD, PhD<sup>9</sup>, Greg Fulcher, MD<sup>7</sup>, Wayne Shaw, DSL<sup>10</sup>, Richard Oh, MD<sup>10</sup>, Mehul Desai, MD<sup>10</sup>, David R. Matthews, DPhil, BM, BCh<sup>11</sup>, and Bruce Neal, MB, ChB, PhD<sup>1,12-14</sup>  
Statistical analyses were conducted by Z. Zhou and K. Rådholm.

<sup>1</sup>The George Institute for Global Health, Faculty of Medicine, University of New South Wales, Sydney, Australia; <sup>2</sup>Department of Radiology, Ren Ji Hospital, School of Medicine, Shanghai Jiao Tong University, Shanghai, China; <sup>3</sup>The George Institute for Global Health and University of Sydney, Sydney, Australia; <sup>4</sup>Division of Community Medicine, Primary Care, Department of Medicine and Health Sciences, Faculty of Health Sciences, Linköping University, Department of Local Care West, County Council of Östergötland, Linköping, Sweden; <sup>5</sup>Royal North Shore Hospital, St. Leonards, Australia; <sup>6</sup>Sydney Adventist Hospital Clinical School, Sydney Medical School, University of Sydney, Sydney, Australia; <sup>7</sup>The Royal North Shore Hospital and University of Sydney, Sydney, Australia; <sup>8</sup>Stanford Center for Clinical Research, Department of Medicine, Stanford University School of Medicine, Stanford, CA, USA; <sup>9</sup>University of Groningen, University Medical Center Groningen, The Netherlands; <sup>10</sup>Janssen Research & Development, LLC, Raritan, NJ, USA; <sup>11</sup>Oxford Centre for Diabetes, Endocrinology and Metabolism and Harris Manchester College, University of Oxford, Oxford, UK; <sup>12</sup>The Charles Perkins Centre, University of Sydney, Sydney Australia; <sup>13</sup>Faculty of Medicine, University of New South Wales, Sydney, Australia; <sup>14</sup>Imperial College London, London, UK.

Corresponding author:

Prof Richard Lindley  
The George Institute for Global Health  
Level 5, 1 King St  
Newtown NSW 2042 Australia  
Tel: +61 404 866 007  
Fax: +61 2 8890 9731  
Email: [rlindley@georgeinstitute.org.au](mailto:rlindley@georgeinstitute.org.au)

## CANVAS Program sites and investigators

### CANVAS

**Argentina:** Pablo Arias, Maria Rosa Ulla, Andres Alvarisqueta, Laura Maffei, Jose Osvaldo Fretes, Silvia Gorban De Lapertosa, Virginia Visco, Georgina Sposetti, Javier Farias, Eduardo Francisco Farias, Maria Cecilia Cantero, Rodolfo Feldman, Maria Carolina Ridruejo, Pedro Calella, Cesar Zaidman; **Australia:** Stephen Stranks, Peak Man Mah, Alison Nankervis, Duncan Topliss, Georgia Soldatos, Richard Simpson, Murray Gerstman, David Colquhoun, Ferdinandus De Looze, Robert Moses, Michael Suranyi, Samantha Hocking, David Packham, Duncan Cooke, Karam Kostner; **Belgium:** Eric Weber, Chris Vercammen, Luc Van Gaal, Jozef Tits, Bart Keymeulen, Chantal Mathieu; **Canada:** Naresh Aggarwal, Dan Dattani, Francois Blouin, Richard Dumas, Sam Henein, Patrick Ma, Ali Najarali, Michael Omahony, Tracy Pella, Wilson Rodger, Daniel Shu, Vincent Woo, Brian Zidel, Lew Pliamm, Brian Ramjattan, Ronald Akhras, Jasmin Belle-Isle, Stuart Ross, Geza Molnar; **Colombia:** Juan Manual Arteaga, Ivonne Jarava; **Czech Republic:** Alena Andresova, Miloslava Komrskova, Cyril Mucha, Tomas Brychta, Dagmar Bartaskova, Romana Urbanova, Tomas Spousta, Jana Havelkova, Tomas Sedlacek, Milan Kvapil; **Estonia:** Ülle Jakovlev, Verner Fogel, Liina Viitas, Mai Soots, Maire Lubi, Marju Past, Jelena Krasnopejeva; **Germany:** Hasan Alawi, Klaus Busch, Felix Klemens Pröpper, Andrea Thron, Stephan Jacob, Andreas Pfützner, Ludger Rose, Thomas Segiet, Christine Kosch, Andrea Moelle; **Great Britain:** Melanie Davies, Hamish Courtney, Martin Gibson, Luigi Gnudi, Frances Game, John Wilding, Thozhukat Sathyapalan, Miles Fisher, Shenaz Ramtoola, Satyan Rajbhandari, Maurice Okane; **Hungary:** Eleonora Beke, Ferenc Poor, Karoly Nagy, Gyozo Kocsis, Tamas Oroszlan, Peter Faludi, Mihaly Gurzo; **India:** Sathyanarayana Srikanta, Mala Dharmalingam, Bala Murugan, Pramod Gandhi, Bipin Sethi, Sosale Aravind, Sharda Ardhanareeshwaran, Arpan Bhattacharyya, Ganapathi Bantwal, Vijay Viswanathan, Paramesh Shamanna, Banshi Saboo, Viswanathan Mohan, Reshma Parmaj, Kirti Kumar Modi, Sindhu Joshi, Sunil Jain, Sanjay Kalra, Arun Chankramath Somasekharan, Prabha Adhikari, Ajay Kumar, Harshada Kudalkar, Rajiv Passey, Mathew John, Sadasivarao Yalamanchi, Keyur Parikh, K.P. Rajesh, Rajesh Nair, Ajay Kumar, Sasi Kumar, Lily Rodrigues, Pawan Gangwal, Pankaj Agarwal, Sandeep Kumar Gupta, Abhay Amrutlal Mutha, Shailaja Dilip Kale, Ravindra Laxman Kulkarni, Sandip Chudasama, Kamal Sharma, Anoop Nambiar, Aniruddha Tangaonkar, Vaishali Deshmukh, Biswakesh Majumdar, Rajendran Veerappan, Deepak Namjoshi; **Israel:** Itamar Raz, Julio Weinstein, Ilana Harman Boehm, Victor Vishlitzky; **Luxembourg:** Frederic Dadoun; **Malaysia:** Rajesh P. Shah, Lai Seong Hooi, Alexander Tan, Wan Mohamad Wan Bebakar, Mafauzy Mohamed, Amir S. Khir, Norlela Sukor, Khalid Abdul Kadir; **Mexico:** Enrique Morales, Sergio Zuñiga, Melchor Alpizar, Cesar Calvo, Rolando Zamarripa, Juan Rosas, Armando Vargas; **The Netherlands:** Max Nieuwdorp, Vicdan Kose, Susanne Kentgens, Gloria Rojas, Wouter Van Kempen, Jacqueline Hoogendijk, Mazin Alhakim, Victor Gerdes, Marcel Hovens, Johan Berends, A. Woittiez, Cees Jan Smit, B. Dekkers, Wilco Spiering, Marcel K. Van Dijk-Okla, Ben P.M. Imholz, Ruud J.M. Van Leendert, Marije Ten Wolde, Peter J.H. Smak Gregoor; **New Zealand:** Russell Scott, Jeremy Krebs, John Baker, Joe Singh, Calum Young; **Norway:** Gisle Langslet, Hans Olav Hoivik, Torbjorn Kjaernli, Sigbjorn Elle, Eric Gjertsen, Knut Risberg, Andreas Tandberg, Leidulv Solnoer, Per Anton Sirmes; **Poland:** Tadeusz Dereziński, Malgorzata Arciszewska, Edward Franek, Ewa Szyprowska, Dariusz Sowinski, Robert Ptryka, Beata Czakanska-Dec, Grazyna Pulka, Katarzyna Jusiak, Mariusz Dabrowski, Piotr Kubalski, Malgorzata Wojciechowska, Andrzej Madej, Danuta Pupek-Musialik; **Russia:** Natalia Blinova, Ludmila Kondratjeva, Anatoly Kuzin, Mikhail Boyarkin, Tatyana Gomova, Alexander Khokhlov, Sergey Vorobjev, Olga Mirolyubova, Svetlana Boldueva, Olga Ershova, Marina Ballyzek, Olga Smolenskaya, Sergey S. Yakushin, Dmitry Zateyshchikov, Mikhail Arkhipov, Alexandr Kuzmenko, Ivan Maksimov, Igor Motylev, Vladimir Rafalskiy, Leonid Strongin, Tatyana Treshkur, Natalya Volkova, Olga Barbarash, Tatiana Raskina, Leonid Bartosh, Inna Nikolskaya, Elena Shutemova, Viktor Gurevich, Natalia Burova, Elena Vorobyeva, Denis Andreev, Boris Bart, Tatiana Khlevchuk, Lyudmila Gapon, Ivan Gordeev, Nikolai Gratsiansky, Alsu Zalevska, Sergey Sayganov, Oleg Solovyev, Galina Reshedko, Natalia Shilkina, Petr Chizhov, Julia Shapovalova, Alexander Sherenkov, Olga Reshetko, Vladimir Simanenkoy; **Spain:** Juan Garcia Puig, Jose Saban, Jose Pascual, Jose Dominguez, Elias Delgado, Carlos Calvo, Manuel Vida, Santiago Duran, Francisco Tinahones, Jordi Salas, Jose Miguel Gonzalez, Manuel Monreal, Armand Grau, Andreu Nubiola, Pere Alvarez; **Sweden:** Kaj Stenlöf, Pekka Koskinen, Carl-Johan Lindholm, Ulrik Mathiesen, Katarina Berndtsson Blom, Bengt-Olov Tengmark, Hans Jul-Nielsen; **Ukraine:** Oleksandr Larin, Svetlana Panina, Svitlana Kovalenko, Olena Voloshyna, Vera Tseluyko, Olga Gyryna, Vadim Vizir, Olga Barna, Maryna Dolzhenko, Yuriy Mostovoy, Vadim Korpachev, Boris Mankovskiy, Mykola Vatutin; **United States:** Charles Arena, Basil Akpunonu, Rahfa Zerikly, Claire Baker, Toby Briskin, Darlene Bartilucci, Joshua Barzilay, Christian Breton, John Buse, Richard Cherlin, Michael Cobble, Clarence Ellis, Raymond Fink, Alan Forker, Ronald Garcia, Priscilla Hollander, Angela House, Daniel Hyman, Richard Ingebretsen, David Jack, Judith Kirstein, Kerri Kissell, Daniel Lorber, Donald McNeil, Wendell Miers, Alex Murray, Robert Call, Stephen T. Ong, Fernando Ovalle, Robert Pearlstein, Veronica Piziak, Daniel Pomposini, David Robertson, Julio Rosenstock, Ulrich Schubart, Shaukat Shah, Rodney Stout, Mark Turner, James Wallace, Leonard Chuck, Edmund Claxton, Emily Morawski, Alan Wynne, Carol Wysham, Michael Alderman, Walter Patton, Bryan Pogue, Arnold Silva, Roger Guthrie, Sam Lerman, Robert Madder, Wendy Miller, Daniel Weiss, Dean Kereiakes, Ronald J Graf, Negah Rassouli, James Greenwald, Hanna Abu-Nassar, Derek Muse, Vicki Kalen, Natalia Hegedosh, Richard Dobrusin, Glover Johnson, Tami Bruce, Gary Gleason.

## CANVAS-R

**Argentina:** Marisa Vico, Sonia Hermida, Lucrecia Nardone, Laura Maffei, Javier Farias, Elizabeth Geltersztein, Maximiliano Sicer, Andres Alvarisqueta, Georgina Sposetti, Virginia Visco, Rodolfo Feldman, Silvia Orio; **Australia:** Christopher Nolan, Michael Suranyi, Samantha Hocking, Stephen Stranks, Duncan Cooke, Ferdinandus de Looze, Ashim Sinha, Timothy Davis, Anthony Russell, Acharya Shamasunder, Murray Gerstman, Richard MacIsaac; **Belgium:** Chris Vercammen, Luc Van Gaal, Chantal Mathieu, Xavier Warling, Jan Behets, Andre Scheen, Guy T'Sjoen, Ann Verhaegen, Isabelle Dumont, Youri Taes, Francis Duyck, Fabienne Lienart; **Brazil:** Adolfo Sparenberg, Adriana Costa e Forti, Addressa Leitao, Cariolina Jungers di Siqueira Chrisman, César Hayashida, Daniel Panarotto, Fabio Rossi dos Sanos, Fadlo Fraige Filho, Flávia Coimbra Maia, Gilmar Reis, Hugo Lisboa, Joao Felicio, Joselita Siqueira, Lilia Nigro Maia, Luiz Alberto Andreotti Turatti, Maria José Cerqueira, Maria Tereza Zanella, Patricia Muszkat, Miguel Nasser Hissa, Teresa Bonansea; **Canada:** Igor Wilderman, Vincent Woo, Richard Dumas, Francois Blouin, Pierre Filteau, George Tsoukas, Peter Milne, Dan Dattani, Chantal Godin, Michael Omahony, Daniel Shu, Jasmin Belle-Isle, Douglas Friars, Anil Gupta, Ted Nemtean, Andrew Steele; **China:** Zhan-Quan Li, Changsheng Ma, Linong Ji, Shuguang Pang, Yan Jing, Ruiping Zhao, Ruifang Bu; **Czech Republic:** Tomas Spousta, Tatana Souckova, Dagmar Bartaskova, Pavlina Kyselova, Lea Raclavska, Milan Kvapil, Jana Havelkova, Emilia Malicherova; **France:** Philippe Zaoui, Didier Gouet, Jean-Pierre Courreges, Salha Fendri, Samy Hadjadj, Bruno Verges, Bogdan Nicolescu Catargi, Sylvaine Clavel, Jean-Jacques Altman, Agnes Hartemann, Gaétan Prevost; **Germany:** Diethelm Tschöpe, Elena Henkel, Rolf Göbel, Jochen Seufert, Hermann Haller, Thomas Behnke, Andreas Pfützner, Gerhard Klausmann, Klaus Busch, Baerbel Hirschhaeuser, Stephan Jacob; **Great Britain:** Melanie Davies, Rob Andrews, Narayan Annamalai, Hamish Courtney, Srikanth Bellary, Mark Blagden, John Clark, Steven Creely, Ken Darzy, Iskandar Idris, Richard Falk, Lucinda Summers, Njaimah Asamoah, Andrew Johnson, See Kwok, Shenaz Ramtoola, Gerry Rayman, Jamie Smith, John Wilding; **Hungary:** Marietta Baranyai, Katalin Csomos, Mihaly Gurzo, Eleonóra Harcsa, Nikosz Kanakaridisz, Nóra Késmárki, Tamas Oroszlan, József Pátkay, Eva Peterfai, Balázs Gaszner, Ildiko Jozsef; **Italy:** Stefano Genovese, Antonio Ettore Pontiroli, Enzo Bonora, Dario Giugliano, Domenico Cucinotta, Giorgio Sesti, Paola Ponzani, Giuseppe Pugliese, Giulio Marchesini Reggiani, Paolo Pozzilli, Sergio Leotta, Emanuela Orsi, Carlo Giorda, Paolo Di Bartolo; **Korea:** Tae-Sun Park, Chung-Gu Cho, In-Joo Kim, Il Seong Nam-Goong, Choon Hee Chung, Ho Chan Cho, Dong-Seop Choi, Kun-Ho Yoon, Nan-Hee Kim, Kyung-Mook Choi, Kyu-Jeung Ahn, Ji-Oh Mok, Soon-Jib Yoo, Tae-Keun Oh, Kwan-Woo Lee, Hak-Chul Jang, Jeong-Hyun Park, In-Kyu Lee, Byung-Joon Kim, Doo-Man Kim, Ho Sang Shon, Moon-Kyu Lee, ShinGon Kim; **Malaysia:** Mafauzy Mohamed, Paranthaman Vengadasalam, Alexander Tong Boon Tan, Wan Mohd Izani Wan Mohamed, Rajesh P Shah, Khalid Yusoff, Amir Sharifuddin Mohd Khir, Florence Tan, Mansor Yahya; **Mexico:** Rafael Violante, Manuel Odin De los Rios, Marco Alcocer, Enrique Morales, Juan Rosas, Armando Vargas, Manuel González, Esperanza Martinez, Jorge Antonio Aldrete, Guillermo Gonzalez, Cynthia Mustieles Rocha, Leobardo Sauque, Paul Frenk, José Luis Arenas; **The Netherlands:** Peter Tichelaar, A Kooy, Albert Van de Wiel, Gerben Lochorn, Peter De Vries, Hans Feenstra, Max Nieuwdorp, Wouter Van Kempen, Mazin Alhakim, Ben Imholz, Ruud van Leendert, Peter Smak Gregoor, Joop Brussen, Hanno Pijl, Manuel Castro Cabezas, F Gonkel, P Smits, Daan Lansdorp, Susanne Kentgens, Aletha Veenendaal, Gloria Rojas; **New Zealand:** John Richmond, Russell Scott, Mike Williams, Dean Quinn, Jeremy Krebs, John Baker, Veronica Crawford, Calum Young; **Poland:** Malgorzata Arciszewska, Krystyna Jedynasty, Dariusz Sowinski, Ewa Szyprowska, Andrzej Madej, Mirosława Polaszewska-Muszynska, Danuta Zytkiewicz-Jaruga, Katarzyna Wasilewska, Piotr Romanczuk, Anna Ocicka-Kozakiewicz, Czeslaw Marcisz, Boguslaw Okopien, Anna Bochenek, Lukasz Wojnowski, Teresa Sliwinska, Barbara Rewerska, Witold Zmuda, Katarzyna Klodawska, Ewa Skokowska, Jacek Fabisiak, Cezary Danilkiewicz; **Puerto Rico:** Elba Perez Vargas, Elizabeth Barranco Santana; **Russia:** Tatiana Raskina, Olga Barbarash, Leonid Bartosh, Igor Motylev, A Kuzin, Olga Reshetko, Tatyana Zykova, Olga Ershova, Marina Balyzek, Vladimir Rafalsky, Natalya Volkova, Nina Nosova, Natalia Burova, Alsu Zalevsckaya, Galina Reshedko, Natalia Shilkina, Petr Chizhov, Alexander Sherenkov, Vladimir Simanenkov, Tatiana Lysenko, Irina Ipatko, Mikhail Boyarkin, Sergey Vorobyev, Lyudmila Gapon, Andrey Obrezan, Valeria Esip, Zhanna Paltsman, Andrey Verbovoy, Fatima Khetagurova, Yuri Shvarts; **Spain:** Pere Alvarez-Garcia, Francisco Martinez Deben, Josep M Grinyo, Carlos Calvo, Carmen Suarez, JM Pascual, Jose Dominguez, Anna Oliveras, Armand Grau, Fernando Gómez Peralta, Luis Alvarez-Sala, Cañizo Francisco, Jorge Gómez Cerezo, Juan Garcia Puig, Carlos Trescolí, Francisco Jose Fuentes Jimenez, Santiago Tofé, Judith López, Javier Nieto Iglesias, Luis Vigil, Santiago Duran Garcia, Jose Luis Gorriz, Pilar Saavedra Vallejo, Francisco Tinahones Madueno, Jose Luis Blanco Coronado, Alfonso Soto, Luis De Teresa, Jose Miguel Gonzalez, Antonio Rodriguez Botaro, Carmina Cuesta; **Sweden:** Bjorn Bragée, Bengt-Olov Tengmark, Hans Jul-Nielsen, Pekka Koskinen, Linda Moris, Fredrik Huss, Pär Jennerjö, Katarina Berndtsson-Blom, Bo Liu, Kaj Stenlöf, Carl-Johan Lindholm, Johan Jendle; **Taiwan:** Dee Pei, Wayne H-H Shue, Chern-En Chiang, Ching-Chu Chen, Ming-Nan Chien, Ping-Yen Liu, Ching-Ling Lin, Yi-Jing Sheen; **Ukraine:** Dmytro Reshotko, Nikolay Rishko, Olexander Samoylov, Valentina Serkova, Ivan Smirnov, Liubov Sokolova, Vira Tseluyko, Vadym Vizir, Tetiana Zlova, Vitaliy Maslyanko, Oleksandr Larin, Valentina Velichko, Lyudmila Prystupa, Nadiya Yarema, Galina Mishanich, Iryna Bondarets, Nataliya Virstyuk, Olexander Serhiyenko, Stepan Pavlyk, Olena Levchenko, Orest Abrahamovych, Volodymyr Botsurko, Maryna Dolzhenko, Victoria Chernikova, Yuriy Karachentsev, Vitaliy Katerenchuk, Vadym Korpachov, Yaroslav Malynovsky, Boris Mankovsky,

Yuriy Mostovoy, Larisa Pererva, Nataliya Pertseva; **United States:** Vicki Conrad, Kenneth Fox, David Jack, Robert Buynak, Michael Dever, John Kirby, Larry Odekirk, Priyantha Wijewardane, Robert Carson, Bruce Seaton, Ann Elizabeth Mohart, Salvatore Bianco, Michael R Cox, Andrew Kim, Steven Geller, Jakkidi Reddy, Derek Muse, Alan Wynne, Harold Bays, Judith Kirstein, James Riser, Ahmed Arif, Claire Baker, Kim Barbel-Johnson, Gary Bedel, Pierre Blemur, Christian Breton, Anna Chang, Brian Naccari, Nancy Jo Coburn, Lisa Cohen, Eric Dedeker, Charles Diederich, John Earl, Anu George, Matthew Gilbert, Gary Gleason, Gregory Haase, Rodney Ison, Mahendra Jain, Imtiaz Alam, Sam Lerman, Lawrence Levinson, Lon D Lynn, Michael Oliver, Barry Kusnick, Robert Pearlstein, Sanford Plevin, Samuel Mujica Trenche, Vernon Young, Michael Jutovsky, Ralph Wade, James Wallace, Albert Weisbrot, Duane Wombolt, Alan Forker, Jalal Taslimi, Roger Guthrie.

## **CANVAS Program committees**

### **Steering Committee**

David R. Matthews (Co-chair), Bruce Neal (Co-chair), Greg Fulcher, Kenneth W. Mahaffey, Vlado Perkovic, Mehul Desai (Sponsor), Dick de Zeeuw

### **Independent Data Monitoring Committee**

Philip Home (Chair), Jeffrey L. Anderson, Ian W. Campbell, John Lachin (withdrew in September 2015), Daniel Scharfstein, Scott D. Solomon, Robert G. Uzzo

### **Cardiovascular Adjudication Committee**

Greg Fulcher (Chair), John Amerena, Clara Chow, Gemma Figtree, John French, Graham Hillis, Mark A. Hlatky, Bronwyn Jenkins, Nicholas J. Leeper, Richard Lindley, Barry McGrath, Alison Street, John Watson

### **Renal Adjudication Committee**

Greg Fulcher (Chair), Shahnaz Shahinfar, Tara Chang, Arjun D. Sinha, Phyllis August

### **Safety Adjudication**

Fracture Adjudication: Bioclinica

Diabetic Ketoacidosis Adjudication: Baim Institute for Clinical Research

Pancreatitis Adjudication Committee: Adam Cheifetz (Chair), Sunil Sheth, Joseph Feuerstein

## **Definitions of stroke and stroke subtypes used by Endpoint Adjudication Committee**

### **Stroke**

A non-fatal stroke was an event that met the current classification definition below and does not result in death within 30 days from onset. The definition was based on the new “tissue” definition of stroke (Sacco et al. Stroke 2013;44:2064). Stroke will also be classified by the Endpoint Adjudication Committee (EAC) according to historical criteria. Any recurrence or exacerbation of the condition within 30 days is considered part of the original episode, whereas beyond that time period it is considered a separate event. Adjudications were based on the best available evidence from the clinical care of the patient with a stroke-like event, with anonymised copies of the medical record sent to stroke experts on the adjudication committee. Events were confirmed if two independent assessors agreed. The documents were sent to a third adjudicator in the event of a disagreement. Three way disagreements were resolved by a full meeting of the adjudication committee.

#### **1. Historical classification**

An acute disturbance of focal neurological function resulting in symptoms lasting more than 24 hours.

#### **2. Current classification**

Stroke is defined as an acute episode of neurological dysfunction caused by focal or global brain, spinal cord, or retinal vascular injury.

##### **a. Ischemic stroke**

Ischemic stroke is defined as an acute episode of focal cerebral, spinal, or retinal dysfunction caused by an infarction of central nervous system tissue.

Hemorrhage may be a consequence of ischemic stroke. In this situation, the stroke is an ischemic stroke with hemorrhagic transformation and not a hemorrhagic stroke.

##### **b. Hemorrhagic stroke**

Hemorrhagic stroke is defined as an acute episode of focal or global cerebral or spinal dysfunction caused by a nontraumatic intraparenchymal, intraventricular, or subarachnoid hemorrhage.

##### **c. Undetermined stroke**

Undetermined stroke is defined as a stroke with insufficient information to allow categorization as ischemic or hemorrhagic.

### **Transient Ischemic Attack**

Transient ischemic attack (TIA) is defined as a transient episode of neurological dysfunction caused by focal brain, spinal cord, or retinal ischemia, without acute infarction.

The distinction between a TIA and an ischemic stroke is the presence of infarction, not the transience of the symptoms. In addition to laboratory documentation of infarction, persistence of symptoms is an acceptable indicator of infarction. Thus, symptoms lasting  $\leq 24$  hours versus  $>24$  hours may be used by the EAC to distinguish between transient ischemia and infarction. The committee will endeavor to review any relevant documentation of the cerebrovascular event. However, in the absence of documentation regarding duration of the symptoms, the committee may on occasion use any other reliable source of information such as the diagnosis of the treating physician to determine if the event was a TIA or stroke.

### **General Considerations**

Evidence of vascular central nervous system injury without recognized neurological dysfunction may be observed. Examples include microhemorrhage, silent infarction, and silent hemorrhage. When encountered, the clinical relevance of these findings may be unclear. If observed, they should be precisely defined and categorized by the EAC.

**Table I. Baseline characteristics of participants with and without cerebrovascular disease (stroke or TIA) at baseline**

|                                                          | With cerebrovascular disease |                 |                | Without cerebrovascular disease |                  |                 | <i>P</i> value <sup>§§</sup> (with vs. without) |
|----------------------------------------------------------|------------------------------|-----------------|----------------|---------------------------------|------------------|-----------------|-------------------------------------------------|
|                                                          | Canagliflozin (N=1113)       | Placebo (N=845) | Total (N=1958) | Canagliflozin (N=4682)          | Placebo (N=3502) | Total* (N=8184) |                                                 |
| Age — y, mean±SD                                         | 63.9±8.5                     | 64.5±8.3        | 64.1±8.4       | 63.0±8.2                        | 63.2±8.2         | 63.1±8.2        | <0.001 <sup>†</sup>                             |
| Female — no. (%)                                         | 433 (38.9)                   | 348 (41.2)      | 781 (39.9)     | 1603 (34.2)                     | 1249 (35.7)      | 2852 (34.8)     | <0.001 <sup>‡</sup>                             |
| Race — no. (%)                                           |                              |                 |                |                                 |                  |                 | <0.001 <sup>‡</sup>                             |
| White                                                    | 934 (83.9)                   | 711 (84.1)      | 1645 (84.0)    | 3574 (76.3)                     | 2725 (77.8)      | 6299 (77.0)     |                                                 |
| Asia                                                     | 99 (8.9)                     | 75 (8.9)        | 174 (8.9)      | 678 (14.5)                      | 432 (12.3)       | 1110 (13.6)     |                                                 |
| Black                                                    | 34 (3.1)                     | 31 (3.7)        | 65 (3.3)       | 142 (3.0)                       | 129 (3.7)        | 271 (3.3)       |                                                 |
| Other <sup>§</sup>                                       | 46 (4.1)                     | 28 (3.3)        | 74 (3.8)       | 288 (6.2)                       | 216 (6.2)        | 504 (6.2)       |                                                 |
| Region — no. (%)                                         |                              |                 |                |                                 |                  |                 | <0.001 <sup>‡</sup>                             |
| North America                                            | 220 (19.8)                   | 158 (18.7)      | 378 (19.3)     | 1205 (25.7)                     | 847 (24.2)       | 2052 (25.1)     |                                                 |
| Central and South America                                | 68 (6.1)                     | 55 (6.5)        | 123 (6.3)      | 469 (10.0)                      | 429 (12.3)       | 898 (11.0)      |                                                 |
| Europe                                                   | 352 (31.6)                   | 292 (34.6)      | 644 (32.9)     | 1691 (36.1)                     | 1274 (36.4)      | 2965 (36.2)     |                                                 |
| Rest of the world                                        | 473 (42.5)                   | 340 (40.2)      | 813 (41.5)     | 1317 (28.1)                     | 952 (27.2)       | 2269 (27.7)     |                                                 |
| Current smoker — no. (%)                                 | 179 (16.1)                   | 137 (16.2)      | 316 (16.1)     | 841 (18.0)                      | 649 (18.5)       | 1490 (18.2)     | 0.03 <sup>‡</sup>                               |
| Hypertension — no. (%)                                   | 1035 (93.0)                  | 791 (93.6)      | 1826 (93.3)    | 4153 (88.7)                     | 3146 (89.8)      | 7299 (89.2)     | <0.001 <sup>‡</sup>                             |
| Heart failure — no. (%)                                  | 280 (25.2)                   | 216 (25.6)      | 496 (25.3)     | 523 (11.2)                      | 442 (12.6)       | 965 (11.8)      | <0.001 <sup>‡</sup>                             |
| Atrial fibrillation — no. (%)                            | 95 (8.5)                     | 74 (8.8)        | 169 (8.6)      | 256 (5.5)                       | 188 (5.4)        | 444 (5.4)       | <0.001 <sup>‡</sup>                             |
| Duration of diabetes                                     | 13.1±8.1                     | 13.5±8.0        | 13.3±8.1       | 13.6±7.6                        | 13.7±7.8         | 13.6±7.7        | 0.07 <sup>†</sup>                               |
| Microvascular disease — no. (%)                          |                              |                 |                |                                 |                  |                 |                                                 |
| Retinopathy                                              | 340 (30.5)                   | 243 (28.8)      | 583 (29.8)     | 863 (18.4)                      | 683 (19.5)       | 1546 (18.9)     | <0.001 <sup>‡</sup>                             |
| Nephropathy                                              | 238 (21.4)                   | 199 (23.6)      | 437 (22.3)     | 756 (16.1)                      | 581 (16.6)       | 1337 (16.3)     | <0.001 <sup>‡</sup>                             |
| Neuropathy                                               | 481 (43.2)                   | 344 (40.7)      | 825 (42.1)     | 1306 (27.9)                     | 979 (28.0)       | 2285 (27.9)     | <0.001 <sup>‡</sup>                             |
| Atherosclerotic vascular disease — no. (%) <sup>  </sup> |                              |                 |                |                                 |                  |                 |                                                 |
| Coronary                                                 | 595 (53.5)                   | 445 (52.7)      | 1040 (53.1)    | 2639 (56.4)                     | 2042 (58.3)      | 4681 (57.2)     | 0.001 <sup>‡</sup>                              |
| Peripheral                                               | 341 (30.6)                   | 237 (28.0)      | 578 (29.5)     | 835 (17.8)                      | 700 (20.0)       | 1535 (18.8)     | <0.001 <sup>‡</sup>                             |
| Any                                                      | 1113 (100.0)                 | 845 (100.0)     | 1958(100.0)    | 3014 (64.4)                     | 2352 (67.2)      | 5366 (65.6)     | <0.001 <sup>‡</sup>                             |
| Cardiovascular disease <sup>#</sup>                      | 1010 (90.7)                  | 744 (88.0)      | 1754 (89.6)    | 2746 (58.7)                     | 2156 (61.6)      | 4902 (59.9)     | <0.001 <sup>‡</sup>                             |
| Amputation — no. (%)                                     | 21 (1.9)                     | 14 (1.7)        | 35 (1.8)       | 115 (2.5)                       | 88 (2.5)         | 203 (2.5)       | 0.07 <sup>‡</sup>                               |

|                                   |                 |                 |                 |                 |                 |                 |                     |
|-----------------------------------|-----------------|-----------------|-----------------|-----------------|-----------------|-----------------|---------------------|
| Body mass index                   | 32.1±5.8        | 31.8±5.6        | 32.0±5.7        | 31.9±5.9        | 32.0±6.0        | 32.0±6.0        | 0.83 <sup>†</sup>   |
| Blood pressure — mmHg             |                 |                 |                 |                 |                 |                 |                     |
| Systolic                          | 136.7±15.4      | 137.2±15.6      | 136.9±15.5      | 136.4±15.9      | 136.8±15.8      | 136.6±15.8      | 0.43 <sup>†</sup>   |
| Diastolic                         | 78.1±9.6        | 78.2±9.7        | 78.1±9.6        | 77.5±9.6        | 77.7±9.7        | 77.6±9.7        | 0.04 <sup>†</sup>   |
| HbA1c — %                         | 8.3±1.0         | 8.2±0.9         | 8.2±0.9         | 8.2±0.9         | 8.3±0.9         | 8.3±0.9         | 0.69 <sup>†</sup>   |
| Cholesterol — mmol/L              |                 |                 |                 |                 |                 |                 |                     |
| Total                             | 4.5±1.3         | 4.5±1.3         | 4.5±1.3         | 4.3±1.1         | 4.3±1.1         | 4.3±1.1         | <0.001 <sup>†</sup> |
| HDL                               | 1.2±0.3         | 1.2±0.3         | 1.2±0.3         | 1.2±0.3         | 1.2±0.3         | 1.2±0.3         | <0.001 <sup>†</sup> |
| LDL                               | 2.4±1.0         | 2.4±1.0         | 2.4±1.0         | 2.3±0.9         | 2.3±0.9         | 2.3±0.9         | <0.001 <sup>†</sup> |
| Ratio of LDL to HDL               | 2.1±1.0         | 2.1±1.0         | 2.1±1.0         | 2.0±0.9         | 2.0±0.9         | 2.0±0.9         | 0.01 <sup>†</sup>   |
| Triglycerides — mmol/L            | 2.0±1.5         | 2.0±1.6         | 2.0±1.6         | 2.0±1.3         | 2.0±1.5         | 2.0±1.4         | 0.90 <sup>†</sup>   |
| eGFR — mL/min/1.73 m <sup>2</sup> | 75.0±20.1       | 74.0±20.9       | 74.6±20.4       | 77.1±20.3       | 76.7±20.8       | 76.9±20.5       | <0.001 <sup>†</sup> |
| UACR — mg/g, median (IQR)         | 14.2 (7.0-44.4) | 12.8 (7.0-52.6) | 13.5 (7.0-46.4) | 12.0 (6.6-40.4) | 11.9 (6.5-42.2) | 12.0 (6.6-40.9) | 0.001 <sup>**</sup> |
| Normoalbuminuria — no. (%)        | 748 (67.9)      | 571 (68.2)      | 1319 (68.0)     | 3264 (70.4)     | 2424 (70.1)     | 5688 (70.3)     | 0.03 <sup>††</sup>  |
| Microalbuminuria — no. (%)        | 271 (24.6)      | 177 (21.1)      | 448 (23.1)      | 1051 (22.7)     | 767 (22.2)      | 1818 (22.5)     |                     |
| Macroalbuminuria — no. (%)        | 83 (7.5)        | 89 (10.6)       | 172 (8.9)       | 323 (7.0)       | 265 (7.7)       | 588 (7.3)       |                     |
| Drug therapy — no. (%)            |                 |                 |                 |                 |                 |                 |                     |
| Insulin                           | 553 (49.7)      | 440 (52.1)      | 993 (50.7)      | 2337 (49.9)     | 1765 (50.4)     | 4102 (50.1)     | 0.64 <sup>‡</sup>   |
| Sulfonylurea                      | 496 (44.6)      | 348 (41.2)      | 844 (43.1)      | 2032 (43.4)     | 1485 (42.4)     | 3517 (43.0)     | 0.92 <sup>‡</sup>   |
| Metformin                         | 818 (73.5)      | 593 (70.2)      | 1411 (72.1)     | 3629 (77.5)     | 2785 (79.5)     | 6414 (78.4)     | <0.001 <sup>†</sup> |
| GLP-1 receptor agonist            | 29 (2.6)        | 33 (3.9)        | 62 (3.2)        | 193 (4.1)       | 152 (4.3)       | 345 (4.2)       | 0.03 <sup>‡</sup>   |
| Statin                            | 831 (74.7)      | 607 (71.8)      | 1438 (73.4)     | 3499 (74.7)     | 2663 (76.0)     | 6162 (75.3)     | 0.09 <sup>‡</sup>   |
| Antithrombotic <sup>‡‡</sup>      | 934 (83.9)      | 698 (82.6)      | 1632 (83.4)     | 3302 (70.5)     | 2537 (72.4)     | 5839 (71.3)     | <0.001 <sup>†</sup> |
| RAAS inhibitor                    | 910 (81.8)      | 678 (80.2)      | 1588 (81.1)     | 3735 (79.8)     | 2793 (79.8)     | 6528 (79.8)     | 0.18 <sup>‡</sup>   |
| β-blocker                         | 599 (53.8)      | 435 (51.5)      | 1034 (52.8)     | 2440 (52.1)     | 1947 (55.6)     | 4387 (53.6)     | 0.53 <sup>‡</sup>   |
| Diuretic                          | 541 (48.6)      | 436 (51.6)      | 977 (49.9)      | 1995 (42.6)     | 1518 (43.3)     | 3513 (42.9)     | <0.001 <sup>†</sup> |
| DPP-4 inhibitor                   | 120 (10.8)      | 104 (12.3)      | 224 (11.4)      | 577 (12.3)      | 460 (13.1)      | 1037 (12.7)     | 0.14 <sup>‡</sup>   |
| Calcium channel blocker           | 436 (39.2)      | 364 (43.1)      | 800 (40.9)      | 1494 (31.9)     | 1149 (32.8)     | 2643 (32.3)     | <0.001 <sup>†</sup> |

CANVAS, CANagliflozin cardioVascular Assessment Study; CANVAS-R, CANagliflozin cardioVascular Assessment Study–Renal; DPP-4, dipeptidyl peptidase-4; eGFR, estimated glomerular filtration rate; GLP-1, glucagon-like peptide-1; HbA1c, glycated hemoglobin; HDL, high-density lipoprotein; IQR, interquartile range; LDL, low-density lipoprotein; RAAS, renin–angiotensin–aldosterone system; SD, standard deviation, UACR, urinary albumin-to-creatinine ratio.

\*One participant was randomized at two different sites, and only the first randomization is included in the intention-to-treat analysis set.

<sup>†</sup>P value corresponds to the test for no difference between with and without stroke history cohorts from analysis of variance (ANCOVA) model.

<sup>‡</sup>P value corresponds to generalized Cochran-Mantel-Haenszel test for no general association.

<sup>§</sup>Includes American Indian or Alaska Native, Native Hawaiian or other Pacific Islander, multiple, other, and unknown.

<sup>||</sup>Some patients had more than one type of atherosclerotic vascular disease.



#A history of cardiovascular disease was defined as a history of symptomatic atherosclerotic vascular disease (coronary, cerebrovascular, or peripheral).

\*\**P* value corresponds to Wilcoxon rank sum test of equal medians.

††*P* value corresponds to Van Elteren test for no association.

‡‡Includes antiplatelets and anticoagulants.

§§*P* value for comparison between total participants with cerebrovascular disease at baseline and total participants without.

**Figure I. CANVAS Program: trial flow chart.**

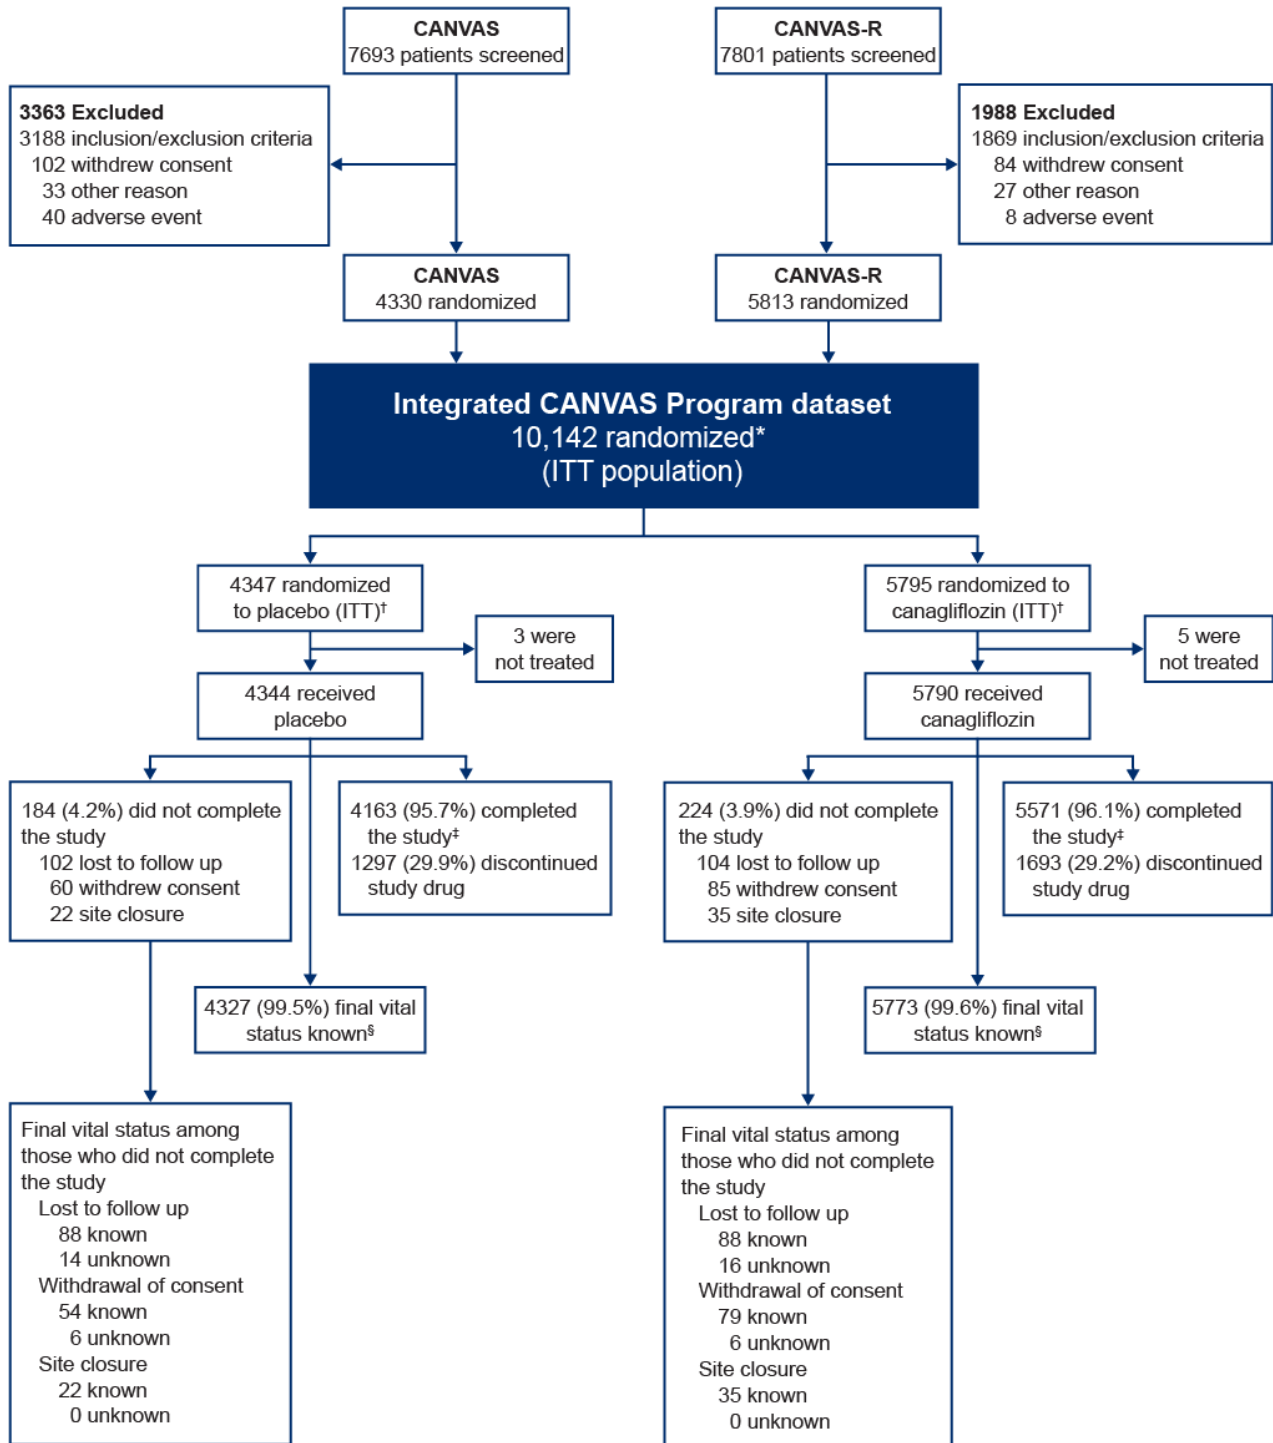

ITT, intent-to-treat.

\*One patient was randomized at 2 different sites and therefore the second randomized ID was excluded from the ITT analysis set.

†Percentages calculated based on the ITT analysis set.

‡A patient is considered as having completed the study, regardless of whether the patient is on or off study drug, if the patient is followed until a time point between the notification of the trial end date (November 1, 2016) and the trial end date (February 23, 2017), or until the time of death for those who died prior to the trial end date.

§Including results from the search of public records.

From New England Journal of Medicine, Neal B, et al., Canagliflozin and Cardiovascular and Renal Events in Type 2 Diabetes, Volume 377, Pages 644-647 Copyright © 2017 Massachusetts Medical Society. Reprinted with permission from Massachusetts Medical Society.

**Figure II. Effects of canagliflozin on stroke risk according to the interval between stroke and last dose of randomized treatment\***

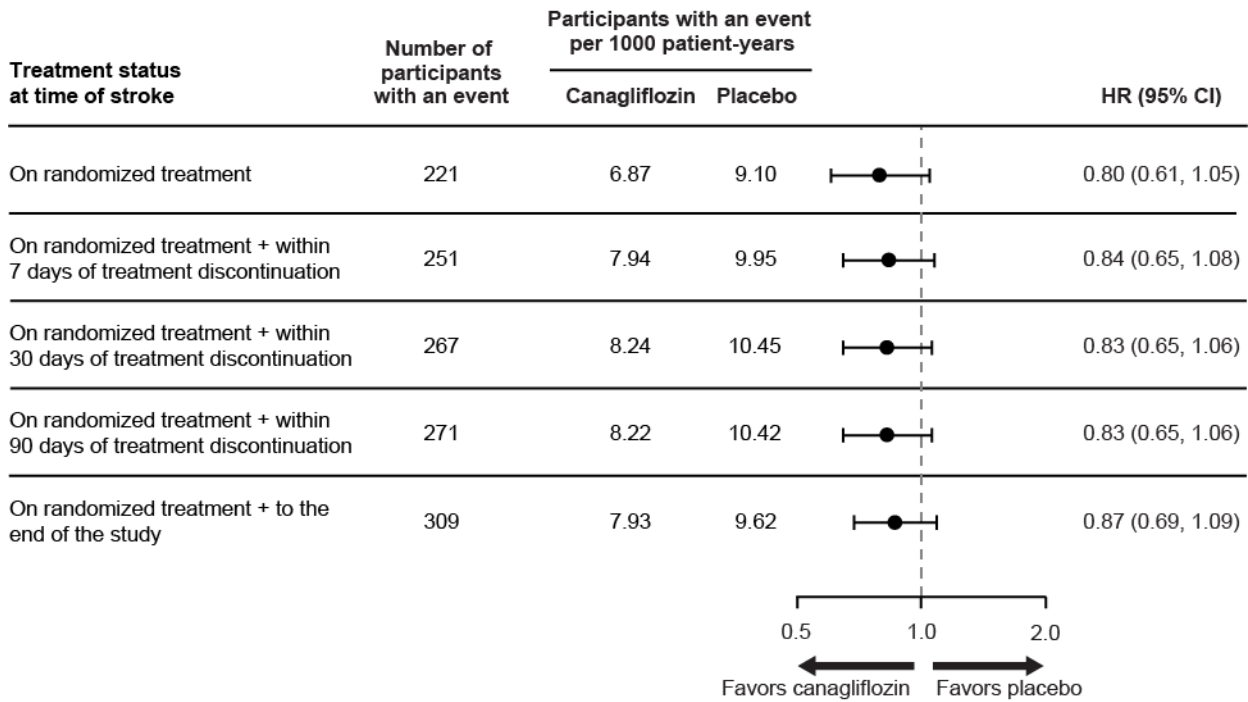

HR, hazard ratio; CI, confidence interval.

\*On-treatment is usually defined as within 30 days of treatment.
