# Supplementary material for: Canagliflozin and Stroke in Type 2 Diabetes Mellitus: Results From the Randomized CANVAS Program Trials
Source: PubMed Central journal article supplement — Stroke. 2018 Dec 28;50(2):396–404. doi: 10.1161/STROKEAHA.118.023009 (PMC6358191; doi:10.1161/strokeaha.118.023009), 2018-12-28
Supplement: str-50-396-s004.pdf [file str-50-396-s004.pdf]

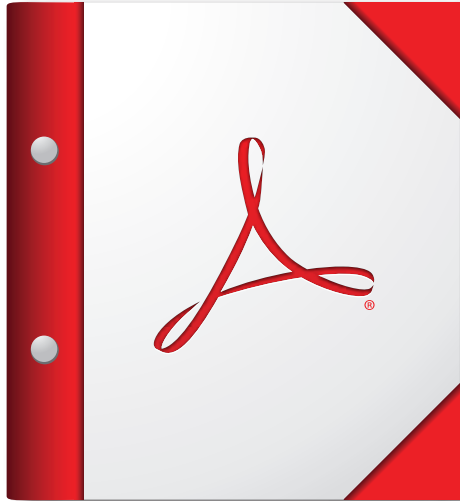

**For the best experience, open this PDF portfolio in  
Acrobat X or Adobe Reader X, or later.**

[Get Adobe Reader Now!](#)
