# Supplementary material for: Canagliflozin and Stroke in Type 2 Diabetes Mellitus: Results From the Randomized CANVAS Program Trials
Source: PubMed Central journal article supplement — Stroke. 2018 Dec 28;50(2):396–404. doi: 10.1161/STROKEAHA.118.023009 (PMC6358191; doi:10.1161/strokeaha.118.023009), 2018-12-28
Supplement: str-50-396-s005.pdf [file str-50-396-s005.pdf]

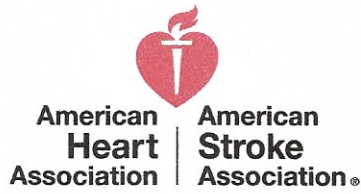

## Acknowledgment Permission Form

---

**Journal** Stroke

**Manuscript Number** STROKE/2018/023009R1

**First Author** Zien Zhou

**Title of Work** Canagliflozin and Stroke in Type 2 Diabetes: Results From the Randomized CANVAS Program Trials

Authors must provide written permission/approval from all individuals mentioned by name in the Acknowledgments section of a submitted manuscript. By signing this form, any and all acknowledged persons therefore state that they have read and approved the mention of their names in the Acknowledgment section of the aforementioned paper.

|           |                       |           |                        |      |                  |
|-----------|-----------------------|-----------|------------------------|------|------------------|
| Name (1)  | <u>SHARON DUNKLEY</u> | Signature | <u><i>SDunkley</i></u> | Date | <u>15 Nov 18</u> |
| Name (2)  | _____                 | Signature | _____                  | Date | _____            |
| Name (3)  | _____                 | Signature | _____                  | Date | _____            |
| Name (4)  | _____                 | Signature | _____                  | Date | _____            |
| Name (5)  | _____                 | Signature | _____                  | Date | _____            |
| Name (6)  | _____                 | Signature | _____                  | Date | _____            |
| Name (7)  | _____                 | Signature | _____                  | Date | _____            |
| Name (8)  | _____                 | Signature | _____                  | Date | _____            |
| Name (9)  | _____                 | Signature | _____                  | Date | _____            |
| Name (10) | _____                 | Signature | _____                  | Date | _____            |
| Name (11) | _____                 | Signature | _____                  | Date | _____            |
| Name (12) | _____                 | Signature | _____                  | Date | _____            |
| Name (13) | _____                 | Signature | _____                  | Date | _____            |
| Name (14) | _____                 | Signature | _____                  | Date | _____            |
| Name (15) | _____                 | Signature | _____                  | Date | _____            |
| Name (16) | _____                 | Signature | _____                  | Date | _____            |
| Name (17) | _____                 | Signature | _____                  | Date | _____            |
| Name (18) | _____                 | Signature | _____                  | Date | _____            |
| Name (19) | _____                 | Signature | _____                  | Date | _____            |
| Name (20) | _____                 | Signature | _____                  | Date | _____            |
